# Supplementary material for: Cryo-EM structure of cell-free synthesized human histamine 2 receptor/Gs complex in nanodisc environment
Source: PubMed Central journal article supplement (PMC10901899; doi:10.1038/s41467-024-46096-z), 2024-02-28
Supplement: 41467_2024_46096_MOESM1_ESM.pdf [file 41467_2024_46096_MOESM1_ESM.pdf]

## Cryo-EM structure of cell-free synthesized human histamine 2 receptor/G<sub>s</sub> complex in nanodisc environment

### Supplementary information

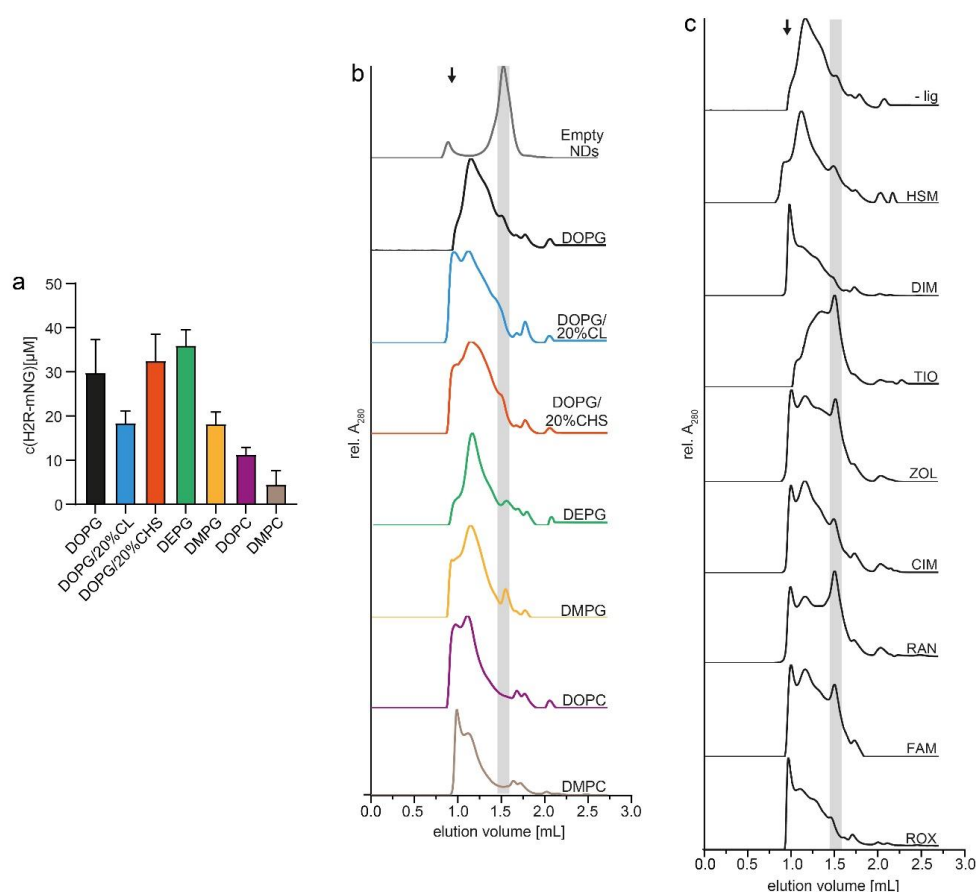

**Supplementary Fig. 1. Effect of lipids and supplied ligands on H<sub>2</sub>R solubilization and sample quality.** **a.** Cotranslational solubilization of H<sub>2</sub>R-mNG in different lipid environments. H<sub>2</sub>R-mNG was synthesized in presence of 60 μM NDs pre-assembled with the indicated lipids. The H<sub>2</sub>R-mNG/ND complexes were Strep-purified and quantified according to the mNG fluorescence. Data are presented as mean (SD) (n = 3 individual experiments). c(H<sub>2</sub>R-mNG) [μM] means concentration of the H<sub>2</sub>R-mNG in μM. Source data are provided as Source Data file. **b.** SEC profiles of Strep-purified H<sub>2</sub>R/ND complexes without mNG moiety and CF synthesized in presence of 60 μM preformed NDs containing membranes with the indicated lipids. H<sub>2</sub>R synthesis in the individual reactions corresponds to the rates given in panel a. **c.** SEC profiles of H<sub>2</sub>R CF synthesized in presence of 60 μM NDs (DOPG) and in presence of supplied ligands. The CF synthesis rate for all reactions was comparable and approx. 30 μM final concentration. –lig: without ligand; HSM: 5 mM histamine; DIM: 5 mM dimaprit; Tio: 200 μM tiotidine; ZOL: 200 μM zolantidine; CIM: 500 μM cimetidine; RAN: 200 μM ranitidine; FAM: 200 μM famotidine; ROX: 200 μM roxatidine. SEC was performed with a Superose 6 3.2/300 column at a flow rate of 0.05 mL/min. Void volumes are indicated by an arrow; Peaks are normalized relative to the most prominent fraction; Fractions of proposed folded H<sub>2</sub>R are indicated in grey.

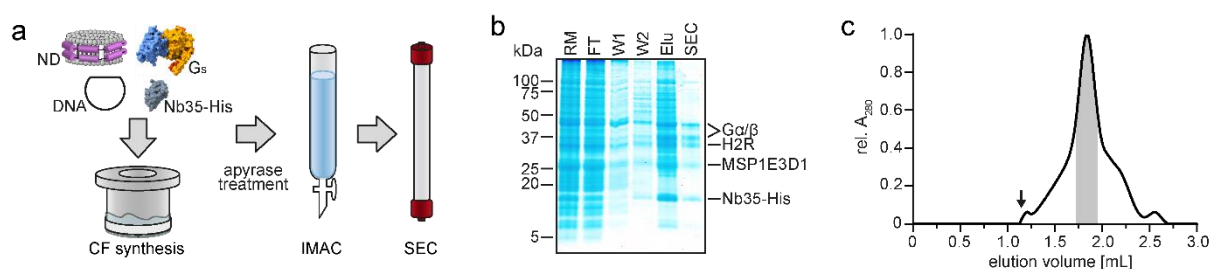

**Supplementary Fig. 2. Cryo-EM sample production workflow.** **a.** H<sub>2</sub>R is synthesized in presence of empty, pre-formed NDs, G<sub>s</sub> heterotrimer and Nb35-His. After apyrase treatment, the sample is subsequently purified by IMAC and SEC. **b.** SDS-PAGE of the H<sub>2</sub>R/ND/G<sub>s</sub>/Nb35-His complex purification process. RM: reaction mix, FT: flow through, W1: first wash, W2: second wash, Elu: elution. **c.** SEC profile of the purified H<sub>2</sub>R/ND/G<sub>s</sub>/Nb35-His complex. Gelfiltration was performed with a Superose 6 5/150 Increase column at a flow rate of 0.15 mL/min. The void volume is indicated by an arrow. The fractions collected and concentrated for cryo-EM analysis are indicated in grey. Fig. 2a was created by Adobe Illustrator CS6.

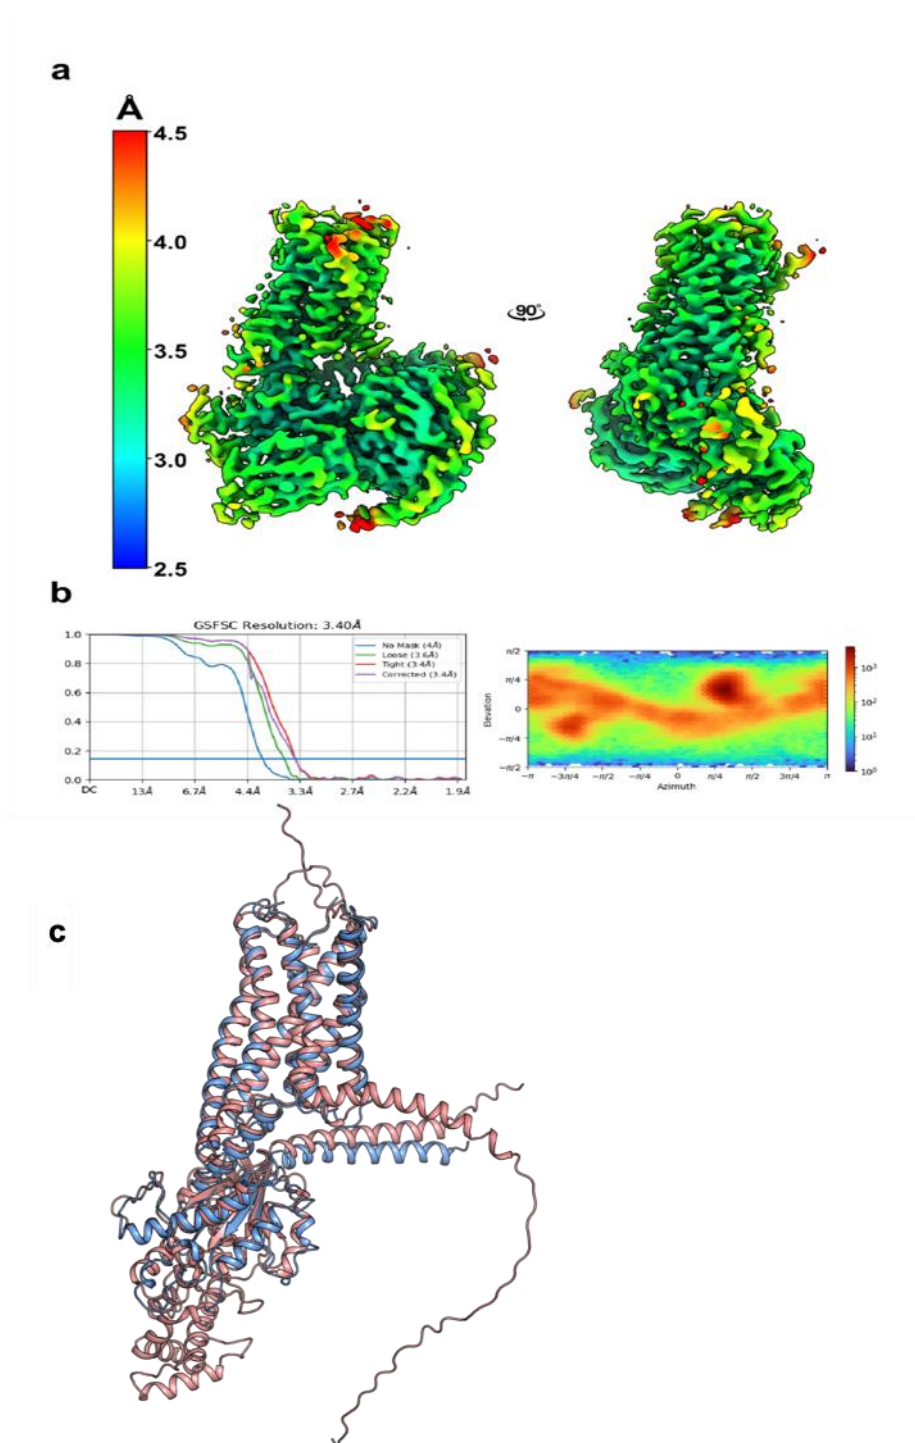

**Supplementary Fig. 3. Resolution of the H<sub>2</sub>R/G<sub>q</sub> complex. a.** Local resolution map of the H<sub>2</sub>R/G<sub>q</sub> complex colored according to resolution. **b.** FSC curve and particle distribution for the displayed map. **c.** Superposition of our experimental complex structure (blue) with the AF2-generated complex model (pink).

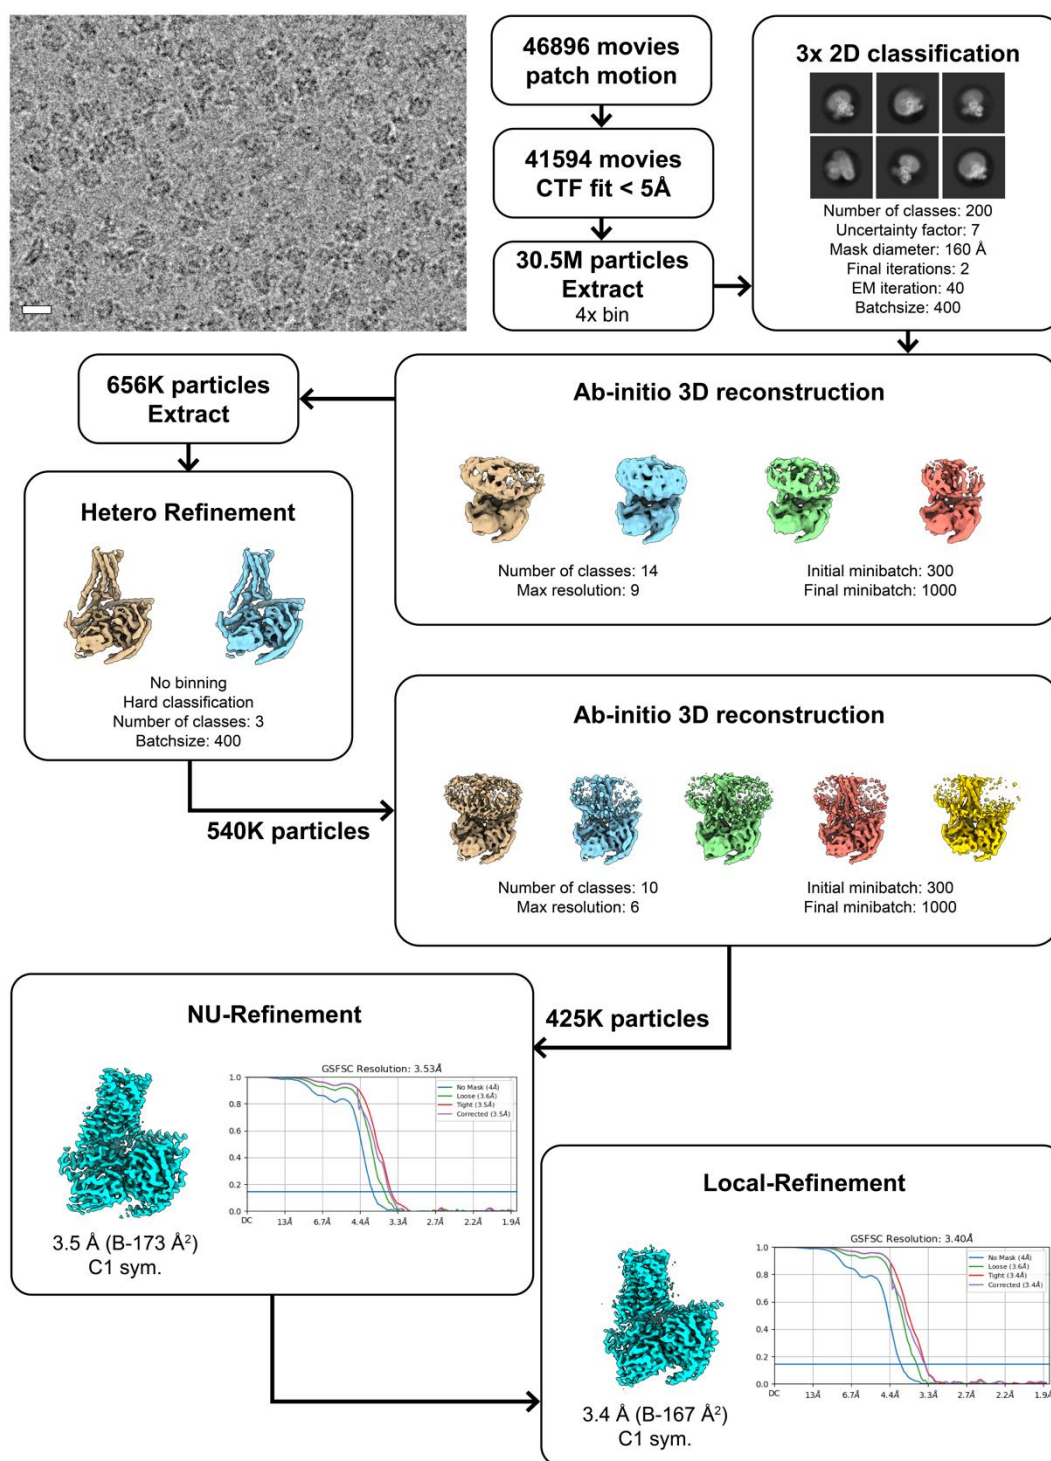

**Supplementary Fig. 4. Cryo-EM data processing workflow.** Processing flow chart for the H<sub>2</sub>R/G<sub>q</sub> complex. Processing was performed in cryoSPARC. A representative cryo-EM micrograph, along with 2D-class averages and with a 100 Å scale bar in the micrograph is shown. Only the selected classes used for further processing were displayed in *ab-initio* 3D reconstruction and hetero refinement charts.

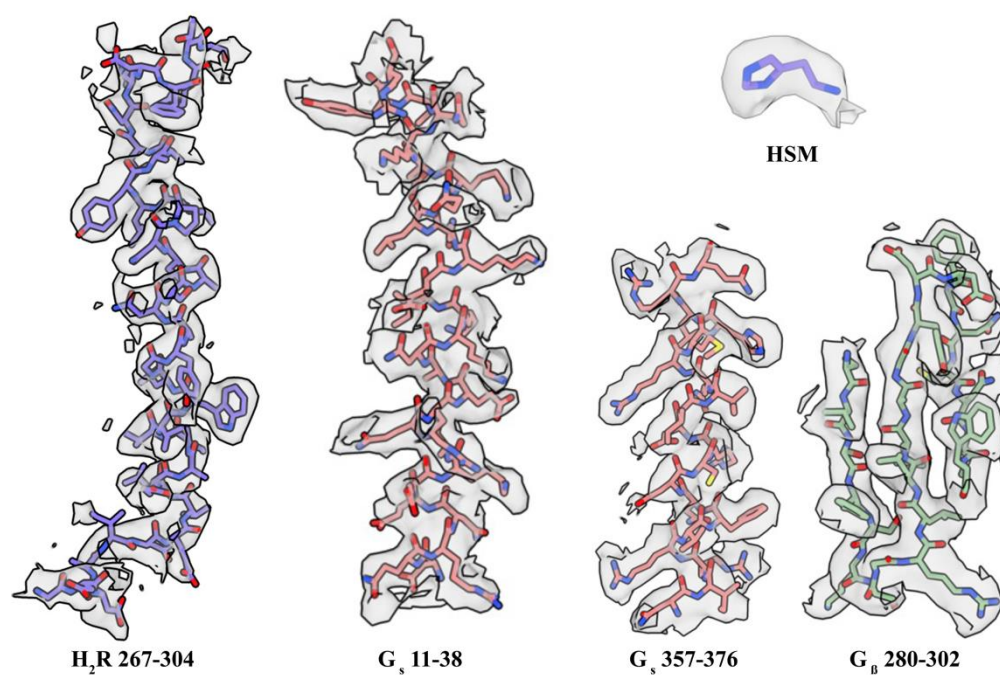

**Supplementary Fig. 5. Representative cryo-EM densities of H<sub>2</sub>R with fitted models.** Shown are the densities of TM7 from amino acid position 267-304 of H<sub>2</sub>R, of the  $\alpha$ -helices 11-38 and 357-376 of G<sub>s</sub>, of the  $\beta$ -sheet 280-302 of G<sub>β</sub> and of the agonist histamine (HSM).

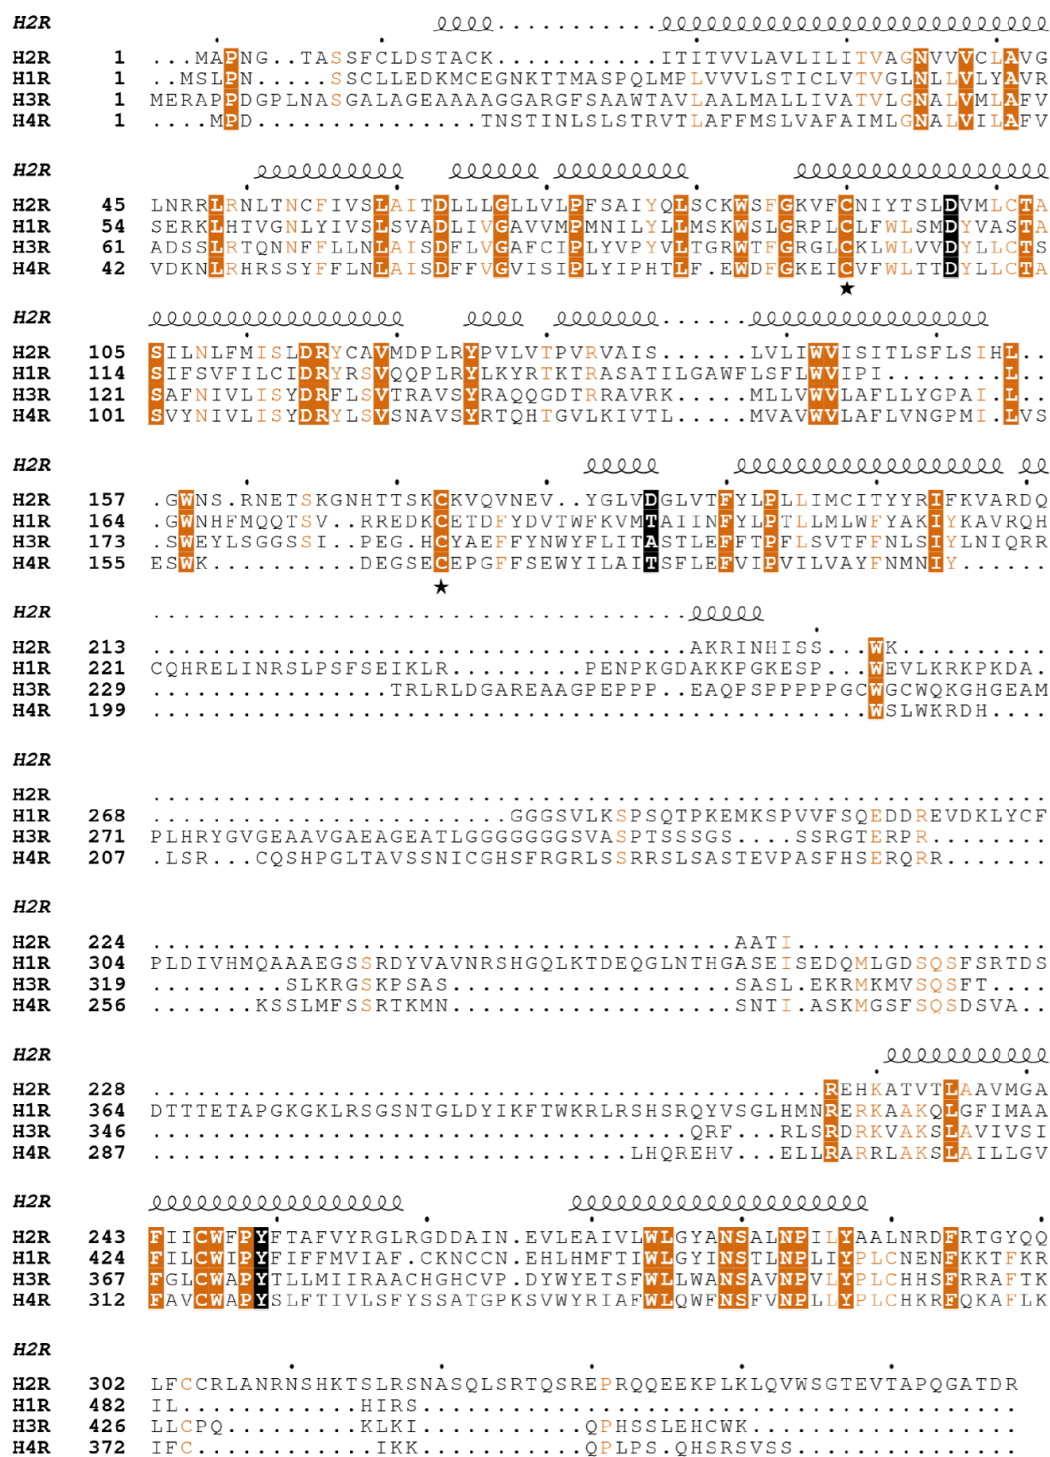

**Supplementary Fig. 6. Amino acid sequence alignment of GPCR histamine receptors.** The secondary structure symbols are illustrated according to the H<sub>2</sub>R structure. Conserved residues are highlighted. The coordinating residues of the ligand are marked with the corresponding boxes in black. Disulfide cysteines marked with asterisks. The alignment figure was made using MAFFT multiple sequence alignment program and ESPript.

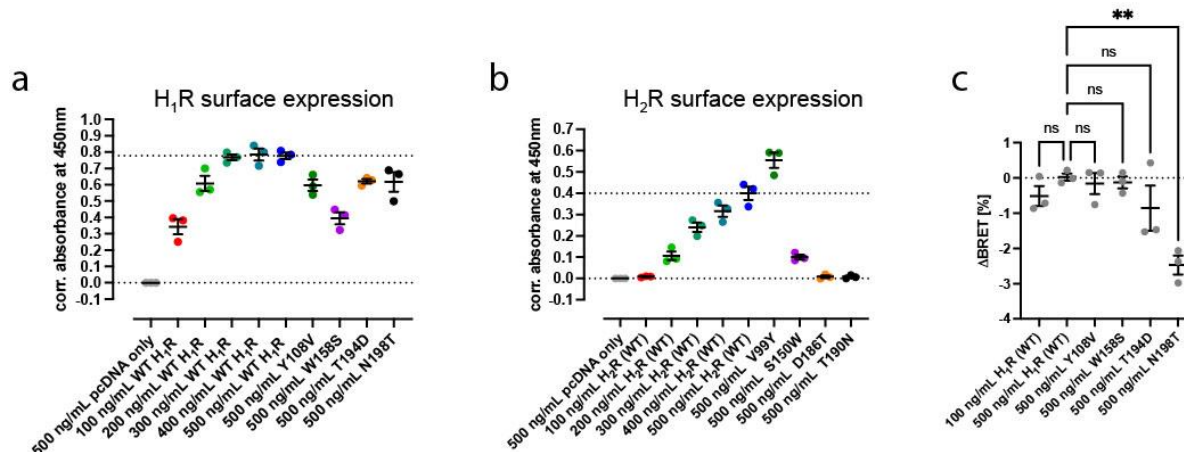

**Supplementary Fig. 7. Comparative surface-expression levels of H<sub>1</sub>R and H<sub>2</sub>R constructs and H<sub>1</sub>R-dependent Gq activation assay.** (a, b) The surface-expression levels of wild-type (WT) and H<sub>1/2</sub>R mutants were quantified using an ELISA against the N-terminal Flag tag. Different amounts of DNA encoding for the WT receptors was used for the transfection into HEK293A cells (ng DNA/mL of transfected cells) to adjust the surface-expression level of the WT to the receptor mutants to ensure comparable protein amounts in the plasma membrane for the BRET-based G protein signaling assays. Data obtained from three independent experiments. (c) Comparison of the ΔBRET response of the H<sub>1</sub>R (WT) and mutants in the presence of 100 uM amthamine showing a statistically significant decrease in the BRET signal of the H<sub>1</sub>R-mutant N198T. Statistical significance in (c) was tested using One-Way ANOVA followed by Fisher's LSD test for multiple comparison. Source data are provided as Source Data file.

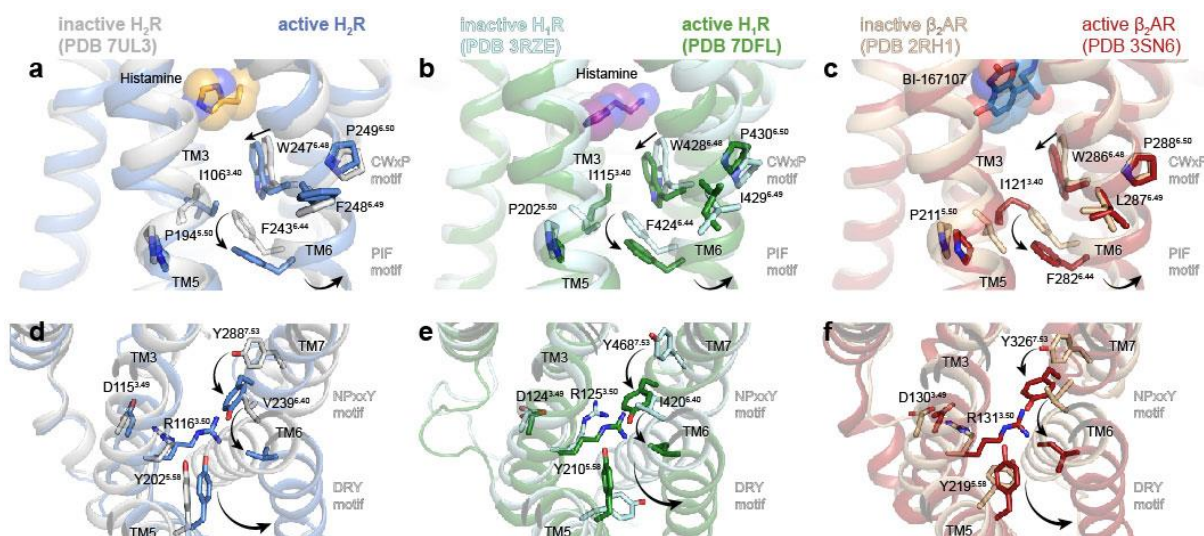

**Supplementary Fig. 8. Comparison of the activation mechanism of the H<sub>2</sub>R, H<sub>1</sub>R and β<sub>2</sub>AR.** **a-f.** Close-up views of the conserved microswitch sequence motifs in the inactive and active structures of the **(a, d)** H<sub>2</sub>R, **(b, e)** H<sub>1</sub>R, and **(c, f)** β<sub>2</sub>AR. The receptors undergo similar conformational changes in the conserved **(a-c)** CWxP and PIF motifs and **(d-f)** NPxxY and DRY motifs, suggesting that these aminergic GPCRs share a similar overall allosteric activation mechanism between the ligand-binding site and the intracellular transducer-coupling cavity. The residues of the conserved microswitches are shown as stick models labeled by residue number and the corresponding Ballesteros-Weinstein numbering (superscript). The receptor-bound agonists are represented as spheres. Arrows indicate the direction of conformational changes upon activation of the receptors.



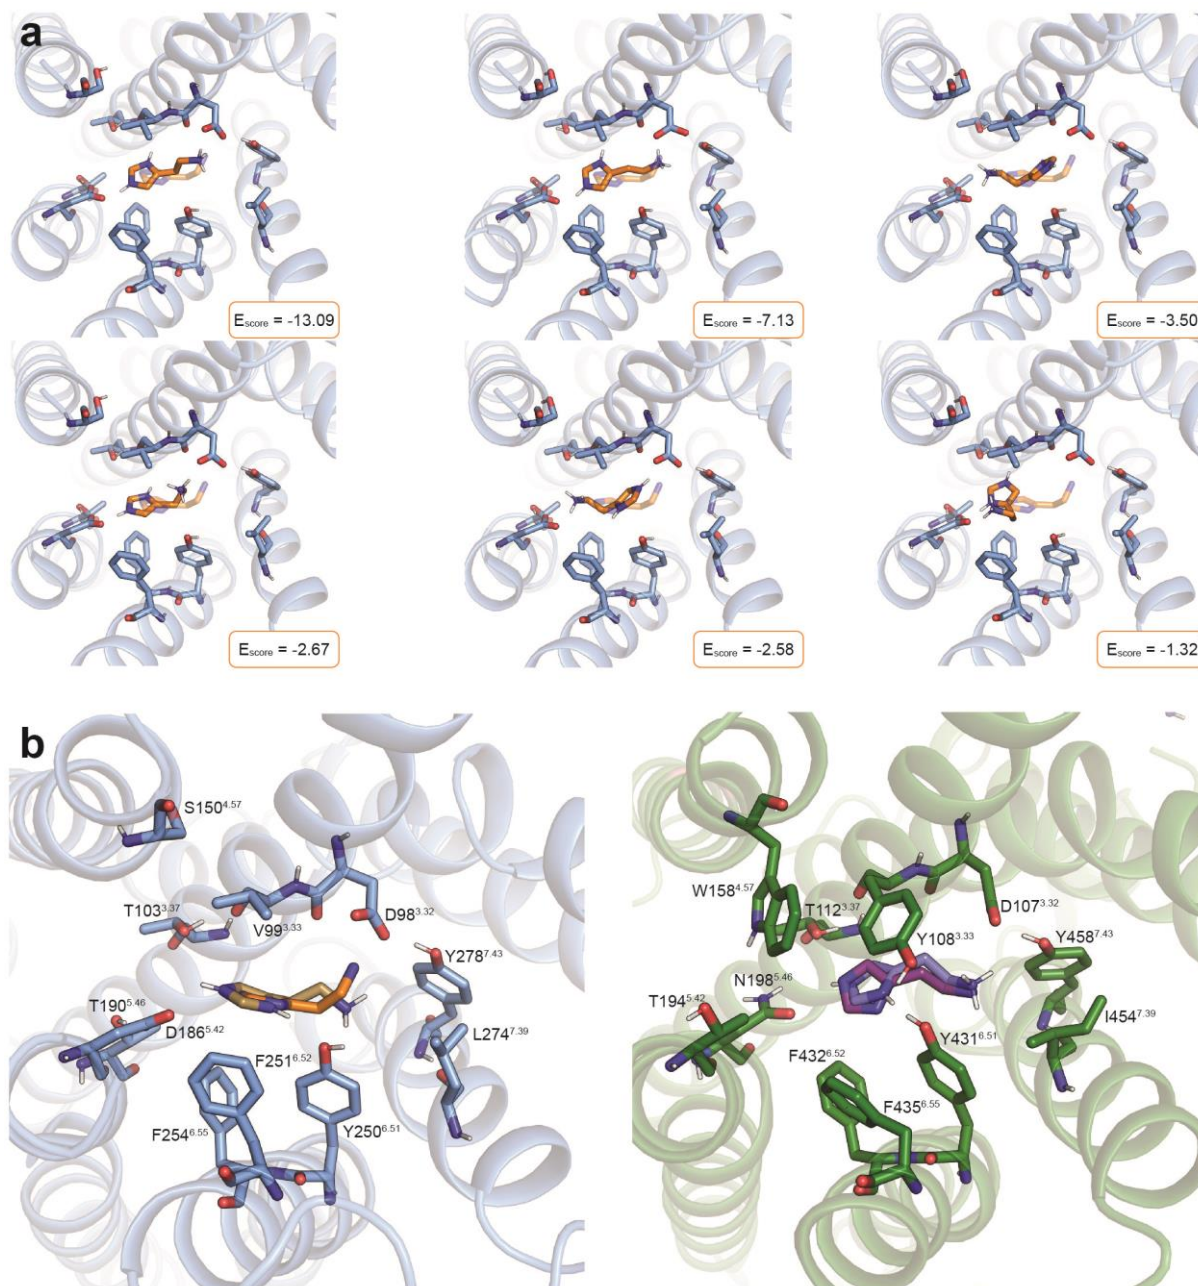

**Supplementary Fig. 9. Histamine binding poses.** (a) The multiple-copy docking software SEED was used to predict possible alternative binding modes (orange carbons) for histamine in the H<sub>2</sub>R in order to assess the likelihood of an alternative orientation compatible with the experimental density. In the orange-framed boxes, the SEED energy score values are reported. The SEED energy score takes into account desolvation and can thus be assumed to yield accurate predictions. Shown are the representatives of the six clusters calculated by SEED in order of descending score. The top-2-scored binding modes are reproducing the experimentally resolved orientation of histamine (yellow carbons), lending additional validity to the experimentally determined orientation. (b) Left: predicted (sand) and experimentally resolved (orange) binding mode of histamine in the H<sub>2</sub>R; Right: predicted (violet) and experimentally resolved (red-purple) binding modes of histamine in the H<sub>1</sub>R. Binding mode predictions were obtained with AutoDock Vina.

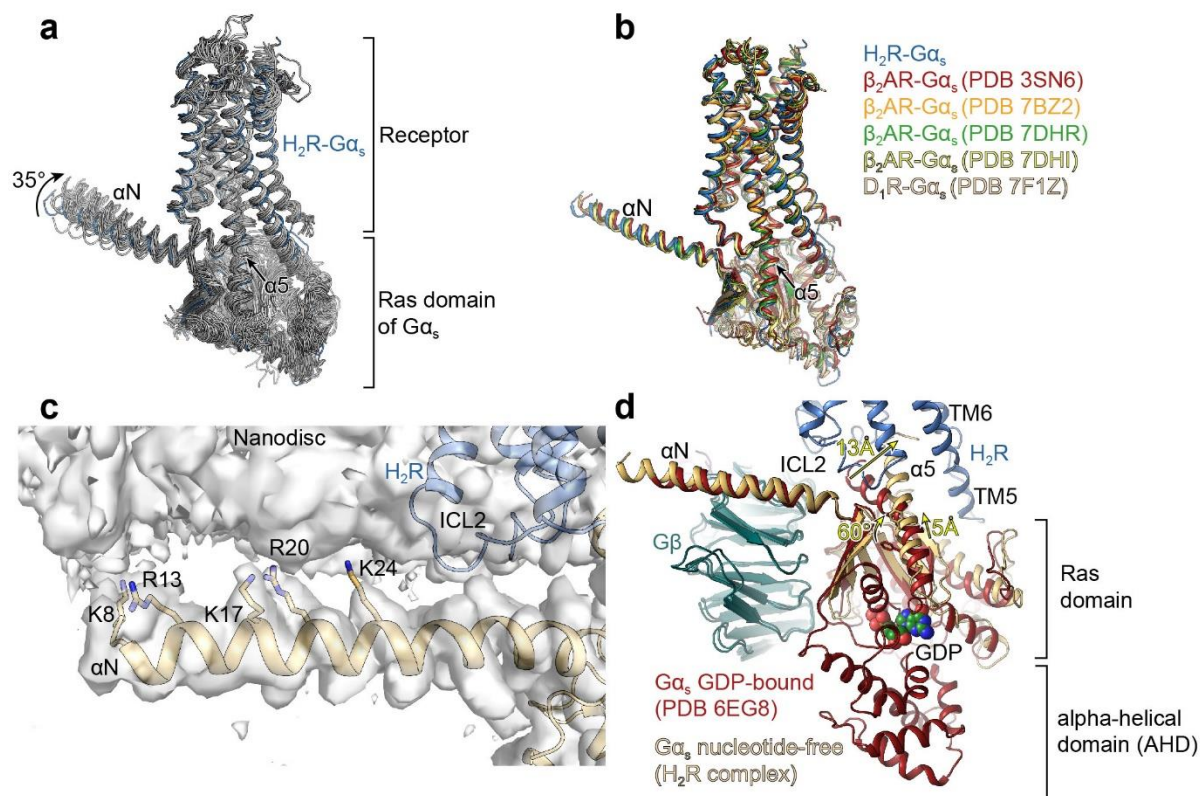

**Supplementary Fig. 10. Orientation and interaction of the G protein  $G_s$  relative to the receptor and the nanodiscs lipid bilayer.** **a.** Comparison of the G protein orientation in aminergic-receptor/ $G_s$  complexes (PDB IDs: 7XT9, 7XT8, 7XTB, 7XTC, 8DCR, 8DCS, 7X2F, 7F10, 7X2D, 7F0T, 7F24, 7F1Z, 7F23, 7XJI, 7XJH, 7S0G, 7DH5, 7JOZ, 7CKZ, 7LJC, 7CKW, 7CKY, 7CRH, 7LJD, 7JV5, 7JVQ, 7JVP, 7DHI, 7DHR, 7JJO, 7BZ2, 6NI3, 3SN6) showing differences in the relative orientation of the  $G\alpha_s$  subunit with respect to the receptor. The  $H_2R-G_s$  complex is highlighted in blue. **b.** Complex structures showing similar receptor-G protein orientations in comparison to the  $H_2R-G\alpha_s$  complex. **c.** Interaction of the  $\alpha N$  helix of  $G\alpha_s$  (wheat) with the nanodisc membrane. Basic lysine and arginine residues that putatively form electrostatic interactions with the polar headgroups of the phospholipids are highlighted as stick models. The  $H_2R$  is highlighted in blue. **d.** Structural changes in  $G_s$  upon coupling to the  $H_2R$ . Major differences between the GDP-bound  $G_s$  structure (PDB ID 6EG8) and the nucleotide-free  $H_2R-G\alpha_s$  complex involves the rotational translation of the  $\alpha 5$  helix into the receptor core and the opening of the alpha-helical domain (AHD) to allow dissociation of the bound GDP (green spheres). Arrows indicate the direction of conformational changes upon activation of the receptors.

**Supplementary Table 1. Cryo-EM data collection, refinement, and validation statistics.**

|                                                     | H <sub>2</sub> R<br>(EMD- 17793)<br>(PDB 8POK) |
|-----------------------------------------------------|------------------------------------------------|
| <b>Data collection</b>                              |                                                |
| Microscope                                          | Glacios                                        |
| Energy filter and camera                            | Falcon 4<br>Selectris                          |
| Energy filter slit width                            | 10 eV                                          |
| Voltage (kV)                                        | 200                                            |
| Nominal magnification                               | 130,000                                        |
| Pixel size (Å)                                      | 0.924                                          |
| Electron exposure (e <sup>-</sup> /Å <sup>2</sup> ) | 50                                             |
| Total exposure time (s)                             | 8.17                                           |
| Number of frames per image                          | 50                                             |
| Total number of images                              | 46896                                          |
| Defocus range (μm)                                  | - 0.8 to - 2.0                                 |
| <b>Image processing</b>                             |                                                |
| Processing software                                 | cryoSPARC                                      |
| Motion correction software                          | cryoSPARC                                      |
| CTF estimation software                             | cryoSPARC                                      |
| Particle selection software                         | cryoSPARC                                      |
| Initial particle images (no.)                       | 30.5 M                                         |
| Final particle images (no.)                         | 425 K                                          |
| Final refinement software                           | cryoSPARC                                      |
| Symmetry imposed                                    | C1                                             |
| Map resolution (Å)                                  | 3.4                                            |
| B-factor (Å <sup>2</sup> )                          | 119.3                                          |
| <b>Refinement statistics</b>                        |                                                |
| Initial model (PDB code)                            | 8POK                                           |
| Modeling software                                   | Coot, PHENIX,<br>model-angelo                  |
| <b>Model composition</b>                            |                                                |
| Non-hydrogen atoms                                  | 8042                                           |
| Protein residues                                    | 1024                                           |
| Water molecules                                     | 0                                              |
| Ligands                                             | 1                                              |
| <b>Mean B factors (Å<sup>2</sup>)</b>               |                                                |
| Protein                                             | 83.89                                          |
| Water molecules                                     | -                                              |
| Ligand                                              | 68.59                                          |
| <b>R.m.s. deviations</b>                            |                                                |
| Bond lengths (Å)                                    | 0.007                                          |
| Bond angles (°)                                     | 0.978                                          |
| <b>Validation</b>                                   |                                                |
| MolProbity score                                    | 1.97                                           |
| Clashscore                                          | 7.35                                           |
| Poor rotamers (%)                                   | 0.00                                           |

## Ramachandran plot

|                |       |
|----------------|-------|
| Favored (%)    | 89.29 |
| Allowed (%)    | 10.71 |
| Disallowed (%) | 0.00  |

---

**Supplementary Table 2. AutoDock Vina docking scores for H<sub>2</sub>R selective agonists (see Methods section).**

| VINA      | H <sub>1</sub> R score | H <sub>2</sub> R score | VINA     | H <sub>1</sub> R score | H <sub>2</sub> R score |
|-----------|------------------------|------------------------|----------|------------------------|------------------------|
| Histamine | -4.8                   | -4.1                   | Dimaprit | -4.3                   | -4.6                   |
|           | -4.8                   | -4.1                   |          | -4.1                   | -4.3                   |
|           | -4.4                   | -4.0                   |          | -4.0                   | -4.3                   |
|           | -4.0                   | -4.0                   |          | -3.8                   | -4.1                   |
|           | -3.8                   | -3.9                   |          | -3.8                   | -4.1                   |
|           | -3.7                   | -3.9                   |          | -3.7                   | -4.1                   |
|           | -3.7                   | -3.9                   |          | -3.7                   | -4.1                   |
|           | -3.7                   | -3.9                   |          | -3.7                   | -4.0                   |
|           | -3.6                   | -3.9                   |          | -3.6                   | -3.8                   |
|           | -3.6                   | -3.7                   |          | -3.5                   | -3.6                   |
| Amthamine | -4.3                   | -4.9                   | Bis157   | -5.6                   | -9.0                   |
|           | -3.9                   | -4.9                   |          | -4.8                   | -8.5                   |
|           | -3.9                   | -4.6                   |          | -4.1                   | -8.3                   |
|           | -3.8                   | -4.5                   |          | -4.1                   | -8.2                   |
|           | -3.8                   | -4.5                   |          | -3.9                   | -7.6                   |
|           | -3.6                   | -4.4                   |          | -3.9                   | -7.6                   |
|           | -3.5                   | -4.4                   |          | -3.8                   | -7.5                   |
|           | -3.5                   | -4.4                   |          | -3.8                   | -7.4                   |
|           | -3.4                   | -4.2                   |          | -3.8                   | -7.3                   |
|           | -3.2                   | -4.2                   |          | -3.1                   | -7.1                   |

**Supplementary Table 3. Docking scores from different docking softwares for H<sub>1</sub>R/H<sub>2</sub>R-selective compounds (see Methods section).**

|           | <b>FRED</b> | <b>HYBRID</b> | <b>DOCK</b> |
|-----------|-------------|---------------|-------------|
| Histamine | -9.6        | -6.9          | -41.6       |
| Amthamine | -8.2        | -6.2          | -39.3       |
| Dimaprit  | -10.8       | -6.8          | nd          |
| Bis-157   | nd          | nd            | -31.9       |
